# Supplementary material for: A combination of multiple chromophores enhances second-harmonic generation in a nonpolar noncentrosymmetric oxide: CdTeMoO6
Source: Royal Society of Chemistry journal article supplement (doi:10.1039/c3tc30151f), 2013-01-01
Supplement: c3tc30151f.pdf [file c3tc30151f.pdf]

Bond valence calculation for CdTeMoO<sub>6</sub>

|                      | <b>bond distances</b> | <b>bond valence</b> |
|----------------------|-----------------------|---------------------|
| Cd—O1                | 2.221                 | 0.42                |
| Cd—O1 <sup>i</sup>   | 2.221                 | 0.42                |
| Cd—O1 <sup>ii</sup>  | 2.221                 | 0.42                |
| Cd—O1 <sup>iii</sup> | 2.221                 | 0.42                |
| Cd                   |                       | <b>1.70</b>         |

---

|                       |       |             |
|-----------------------|-------|-------------|
| Mo—O2                 | 1.709 | 1.71        |
| Mo—O2 <sup>viii</sup> | 1.709 | 1.71        |
| Mo—O3                 | 1.869 | 1.11        |
| Mo—O3 <sup>viii</sup> | 1.869 | 1.11        |
| Mo                    |       | <b>5.63</b> |

---

|                     |       |             |
|---------------------|-------|-------------|
| Te—O1 <sup>i</sup>  | 1.877 | 1.31        |
| Te—O1 <sup>iv</sup> | 1.877 | 1.31        |
| Te—O3               | 2.148 | 0.63        |
| Te—O3 <sup>v</sup>  | 2.148 | 0.63        |
| Te                  |       | <b>3.88</b> |

---

Symmetry code: (i) 1-x, 1-y, z; (ii) 1-y, x, 1-z; (iii) y, 1-x, 1-z; (iv) 1+x, y, z;  
(v) 2-x, 1-y, z; (vi) -1+x, y, z; (vii) -0.5+x, 0.5-y, 1-z; (viii) 1-x, -y, z.

| TeO <sub>4</sub> in CdTeMoO <sub>6</sub> |                  |         | Cart. Coord.                 |           |         | distance | unit vector           |          |         | dipole moment for each |              |          |           |
|------------------------------------------|------------------|---------|------------------------------|-----------|---------|----------|-----------------------|----------|---------|------------------------|--------------|----------|-----------|
| Z                                        | atom             | charges | x                            | y         | z       | Å        | x                     | y        | z       | unitized Vec           | C_grav       | C_charge | u_debye   |
| 52                                       | Te               | 3.88    | 5.286                        | 2.643     | 2.19787 |          |                       |          |         |                        |              |          |           |
| 8                                        | O1 <sup>i</sup>  | -1.31   | 4.27637                      | 3.652626  | 3.41698 | 1.877    | -0.53789              | 0.53789  | 0.6495  | 1                      | 0.13333      | 0.16212  | 14.9      |
| 8                                        | O1 <sup>iv</sup> | -1.31   | 6.29563                      | 1.633374  | 3.41698 | 1.877    | 0.53789               | -0.53789 | 0.6495  | 1                      | 0.13333      | 0.16212  | 14.9      |
| 8                                        | O3               | -0.63   | 3.79482                      | 1.1518194 | 2.60376 | 2.148    | -0.69422              | -0.69422 | 0.18896 | 1                      | 0.13333      | 0.15207  | 11.0      |
| 8                                        | O3 <sup>v</sup>  | -0.63   | 6.77718                      | 4.1341806 | 2.60376 | 2.148    | 0.69422               | 0.69422  | 0.18896 | 1                      | 0.13333      | 0.15207  | 11.0      |
| 2                                        | Lp               | -2      | 0                            | 0         | -1.25   | 1.25     | 0                     | 0        | -1      | 1                      | 0.03704      | 0.07675  | 12.4      |
|                                          |                  |         | Cell Volume                  |           |         | 252.95   |                       |          |         | Dipole Moment          |              |          | Magnitude |
|                                          |                  |         | Z                            |           |         | 2        |                       |          |         | x                      | y            | z        |           |
|                                          |                  |         | <b>Total Dipole Moment =</b> |           |         | 0.0875   | esu*cm/Å <sup>3</sup> | 0        | 0       | 11.07                  | <b>11.07</b> | esu*cm   |           |

| MoO <sub>4</sub> in CdTeMoO <sub>6</sub> |                    |         | Cart. Coord. |          |         | distance                     | unit vector |                       |          |              | dipole moment for each |               |         |           |
|------------------------------------------|--------------------|---------|--------------|----------|---------|------------------------------|-------------|-----------------------|----------|--------------|------------------------|---------------|---------|-----------|
| Z                                        | atom               | charges | x            | y        | z       | Å                            | x           | y                     | z        | unitized Vec | C_grav                 | C_charge      | u_debye |           |
| 42                                       | Mo                 | 5.63    | 2.643        | 0        | 1.68619 |                              |             |                       |          |              |                        |               |         |           |
| 8                                        | O2                 | -1.71   | 1.68993      | 0.95307  | 0.63553 | 1.709                        | -0.55767    | 0.55767               | -0.61478 | 0.99995605   | 0.16                   | 0.21069       | 19.2    |           |
| 8                                        | O2 <sup>viii</sup> | -1.71   | 3.59607      | -0.95307 | 0.63553 | 1.709                        | 0.55767     | -0.55767              | -0.61478 | 0.99995605   | 0.16                   | 0.21069       | 19.2    |           |
| 8                                        | O3                 | -1.11   | 3.79482      | 1.15182  | 2.60376 | 1.869                        | 0.61628     | 0.61628               | 0.49094  | 1.00061529   | 0.16                   | 0.20028       | 16.4    |           |
| 8                                        | O3 <sup>viii</sup> | -1.11   | 1.49118      | -1.15182 | 2.60376 | 1.869                        | -0.61628    | -0.61628              | 0.49094  | 1.00061529   | 0.16                   | 0.20028       | 16.4    |           |
|                                          |                    |         |              |          |         |                              |             |                       |          |              |                        |               |         |           |
|                                          |                    |         |              |          |         | Cell Volume                  | 252.95      |                       |          |              |                        | Dipole Moment |         | Magnitude |
|                                          |                    |         |              |          |         | Z                            | 2           | x                     | y        | z            |                        |               |         |           |
|                                          |                    |         |              |          |         | <b>Total Dipole Moment =</b> | 0.0587      | esu*cm/Å <sup>3</sup> | 0        | 0            | -7.42                  | <b>7.42</b>   | debye   |           |

| CdO <sub>4</sub> in CdTeMoO <sub>6</sub> |                   |         | Cart. Coord. |         |         | distance                     | unit vector |                       |          |              | dipole moment for each |          |         |           |
|------------------------------------------|-------------------|---------|--------------|---------|---------|------------------------------|-------------|-----------------------|----------|--------------|------------------------|----------|---------|-----------|
| Z                                        | atom              | charges | x            | y       | z       | Å                            | x           | y                     | z        | unitized Vec | C_grav                 | C_charge | u_debye |           |
| 48                                       | Cd                | 1.70    | 2.643        | 2.643   | 4.533   |                              |             |                       |          |              |                        |          |         |           |
| 8                                        | O1                | -0.42   | 1.00963      | 1.63337 | 3.41698 | 2.221                        | -0.73543    | -0.45459              | -0.50249 | 1            | 0.14286                | 0.15394  | 6.5     |           |
| 8                                        | O1 <sup>i</sup>   | -0.42   | 4.27637      | 3.65263 | 3.41698 | 2.221                        | 0.73543     | 0.45459               | -0.50249 | 1            | 0.14286                | 0.15394  | 6.5     |           |
| 8                                        | O1 <sup>ii</sup>  | -0.42   | 3.65263      | 1.00963 | 5.64902 | 2.221                        | 0.45459     | -0.73543              | 0.50249  | 1            | 0.14286                | 0.15394  | 6.5     |           |
| 8                                        | O1 <sup>iii</sup> | -0.42   | 1.63337      | 4.27637 | 5.64902 | 2.221                        | -0.45459    | 0.73543               | 0.50249  | 1            | 0.14286                | 0.15394  | 6.5     |           |
|                                          |                   |         |              |         |         |                              |             |                       |          |              |                        |          |         |           |
|                                          |                   |         |              |         |         | Cell Volume                  | 252.95      |                       |          |              | Dipole Moment          |          |         | Magnitude |
|                                          |                   |         |              |         |         | Z                            | 2           |                       |          |              | x                      | y        | z       |           |
|                                          |                   |         |              |         |         | <b>Total Dipole Moment =</b> | 0           | esu*cm/A <sup>3</sup> | 0        | 0            | 0                      | <b>0</b> | debye   |           |
