# Supplementary material for: A combination of multiple chromophores enhances second-harmonic generation in a nonpolar noncentrosymmetric oxide: CdTeMoO6
Source: Royal Society of Chemistry journal article supplement (doi:10.1039/c3tc30151f), 2013-01-01
Supplement: c3tc30151f_2.pdf [file c3tc30151f_2.pdf]

## Supporting Information

### Combination of Multiple Chromophores Enhances Second-Harmonic Generation in Nonpolar Noncentrosymmetric Oxide: CdTeMoO<sub>6</sub>

Sangen Zhao,<sup>a,†</sup> Xingxing Jiang,<sup>b,c,†</sup> Ran He,<sup>b,c</sup> Shu-quan Zhang,<sup>a</sup> Zihua Sun,<sup>a</sup>  
Junhua Luo,<sup>\*,a</sup> Zheshuai Lin,<sup>\*,b</sup> and Maochun Hong<sup>a</sup>

<sup>a</sup>Key Laboratory of Optoelectronic Materials Chemistry and Physics, Fujian Institute of Research on the Structure of Matter, Chinese Academy of Sciences, Fuzhou, Fujian 350002, China

<sup>b</sup>Beijing Center for Crystal R&D, Key Lab of Functional Crystals and Laser Technology of Chinese Academy of Sciences, Technical Institute of Physics and Chemistry, Chinese Academy of Sciences, Beijing 100190, China

<sup>c</sup>University of Chinese Academy of Sciences, Beijing 100049, China

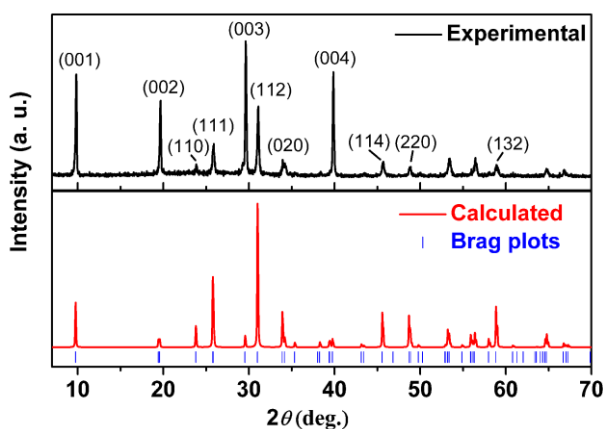

**Figure S1.** Experimental and calculated PXRD patterns for CdTeMoO<sub>6</sub>.

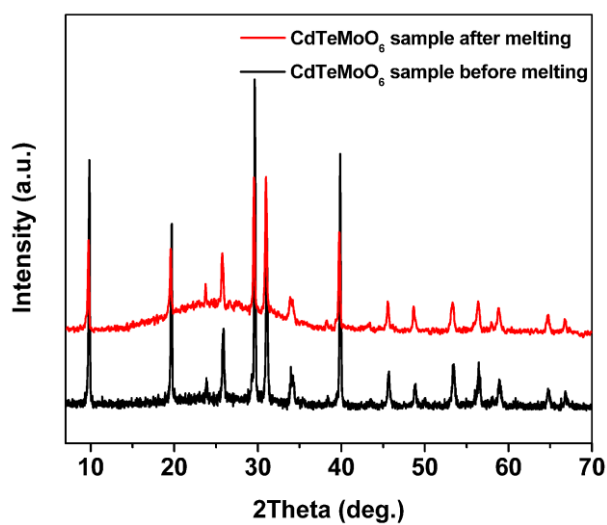

Figure S2. PXRD patterns of CdTeMo<sub>6</sub> powders before and after melting.

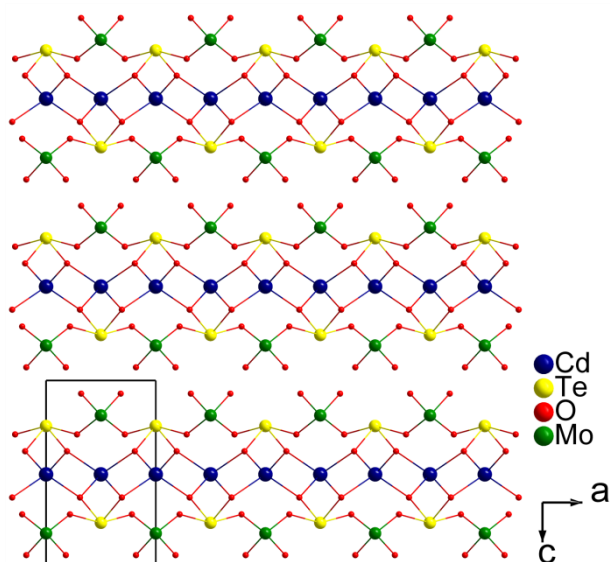

Figure S3. The neutral layered structure of CdTeMo<sub>6</sub>.

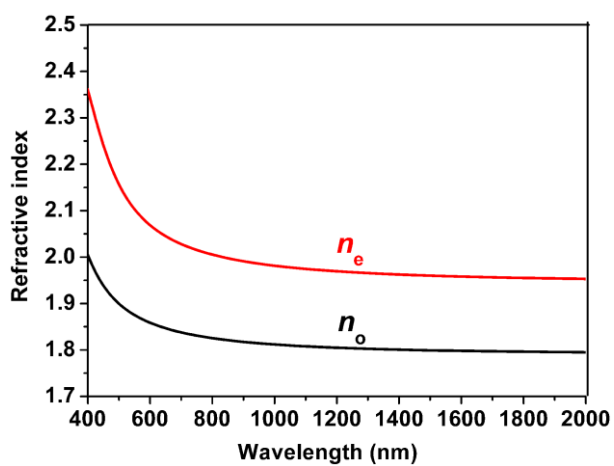

Figure S4. Calculated linear refractive indices for CdTeMo<sub>6</sub>.

**Table S1.** Atomic coordinates and equivalent isotropic displacement parameters ( $\text{\AA}^2$ ) for  $\text{CdTeMoO}_6$ .

| Atom | Wyck. | $x/a$     | $y/b$     | $z/c$      | $U_{\text{eq}} [\text{\AA}^2]^a$ |
|------|-------|-----------|-----------|------------|----------------------------------|
| Cd   | 2b    | 1/2       | 1/2       | 1/2        | 0.0094(1)                        |
| Te   | 2c    | 1         | 1/2       | 0.24243(4) | 0.0074(1)                        |
| Mo   | 2c    | 1/2       | 0         | 0.18599(6) | 0.0081(1)                        |
| O1   | 4e    | 0.1910(6) | 0.3090(6) | 0.3769(4)  | 0.0137(8)                        |
| O2   | 4e    | 0.3197(5) | 0.1803(5) | 0.0701(5)  | 0.0161(9)                        |
| O3   | 4e    | 0.7179(5) | 0.2179(5) | 0.2872(5)  | 0.0125(8)                        |

<sup>a</sup>  $U_{\text{eq}}$  is defined as one-third of the trace of the orthogonalized  $U_{ij}$  tensor.

**Table S2.** Selected bond distances ( $\text{\AA}$ ) and angles (deg.) for  $\text{CdTeMoO}_6$ .

|                                        |            |                                           |           |
|----------------------------------------|------------|-------------------------------------------|-----------|
| Cd—O1                                  | 2.221(2)   | Te—O3 <sup>v</sup>                        | 2.148(4)  |
| Cd—O1 <sup>i</sup>                     | 2.221(2)   | Te—O3                                     | 2.148(4)  |
| Cd—O1 <sup>ii</sup>                    | 2.221(2)   | Mo—O2                                     | 1.709(4)  |
| Cd—O1 <sup>iii</sup>                   | 2.221(2)   | Mo—O3                                     | 1.869(4)  |
| Te—O1 <sup>iv</sup>                    | 1.877(4)   | Mo—O2 <sup>viii</sup>                     | 1.709(4)  |
| Te—O1 <sup>i</sup>                     | 1.877(4)   | Mo—O3 <sup>viii</sup>                     | 1.869(4)  |
| O1—Cd—O1 <sup>i</sup>                  | 119.65(18) | O1 <sup>iv</sup> —Te—O3                   | 82.95(8)  |
| O1—Cd—O1 <sup>ii</sup>                 | 104.63(8)  | O1 <sup>i</sup> —Te—O3                    | 82.95(8)  |
| O1 <sup>i</sup> —Cd—O1 <sup>ii</sup>   | 104.63(8)  | O3 <sup>v</sup> —Te—O3                    | 158.2(2)  |
| O1—Cd—O1 <sup>iii</sup>                | 104.63(8)  | O2 <sup>viii</sup> —Mo—O2                 | 104.1(3)  |
| O1 <sup>i</sup> —Cd—O1 <sup>iii</sup>  | 104.63(8)  | O2 <sup>viii</sup> —Mo—O3                 | 107.57(9) |
| O1 <sup>ii</sup> —Cd—O1 <sup>iii</sup> | 119.65(18) | O2—Mo—O3                                  | 107.57(9) |
| O1 <sup>iv</sup> —Te—O1 <sup>i</sup>   | 99.0(3)    | O2 <sup>viii</sup> —Mo—O3 <sup>viii</sup> | 107.57(9) |
| O1 <sup>iv</sup> —Te—O3 <sup>v</sup>   | 82.95(8)   | O2—Mo—O3 <sup>viii</sup>                  | 107.57(9) |
| O1 <sup>i</sup> —Te—O3 <sup>v</sup>    | 82.95(8)   | O3—Mo—O3 <sup>viii</sup>                  | 121.2(2)  |

Symmetry codes: (i) 1-x, 1-y, z; (ii) 1-y, x, 1-z; (iii) y, 1-x, 1-z; (iv) 1+x, y, z; (v) 2-x, 1-y, z; (vi) -1+x, y, z; (vii) -0.5+x, 0.5-y, 1-z; (viii) 1-x, -y, z.

**Table S3.** Anisotropic displacement parameters ( $\text{\AA}^2$ ) for  $\text{CdTeMoO}_6$ .

| Atom | $U_{11}$    | $U_{22}$    | $U_{33}$  | $U_{12}$    | $U_{13}$    | $U_{23}$    |
|------|-------------|-------------|-----------|-------------|-------------|-------------|
| Cd   | 0.00836(18) | 0.00836(18) | 0.0116(2) | 0           | 0           | 0           |
| Te   | 0.00848(16) | 0.00848(16) | 0.0053(2) | 0.0009(4)   | 0           | 0           |
| Mo   | 0.00856(18) | 0.00856(18) | 0.0072(3) | -0.0029(6)  | 0           | 0           |
| O1   | 0.0137(11)  | 0.0137(11)  | 0.014(2)  | -0.0032(18) | -0.0077(12) | 0.0077(12)  |
| O2   | 0.0184(13)  | 0.0184(13)  | 0.011(2)  | 0.0037(17)  | -0.0030(14) | 0.0030(14)  |
| O3   | 0.0121(12)  | 0.0121(12)  | 0.013(2)  | -0.0046(17) | -0.0015(13) | -0.0015(13) |
